# Supplementary material
Source: PubMed Central journal article supplement (PMC9246995)
Supplement: NIHMS1799098-supplement-Supplemental_Data_File___doc___tif__pdf__etc___1.pdf [file NIHMS1799098-supplement-Supplemental_Data_File___doc___tif__pdf__etc___1.pdf]

## Supplementary Figure 1

A

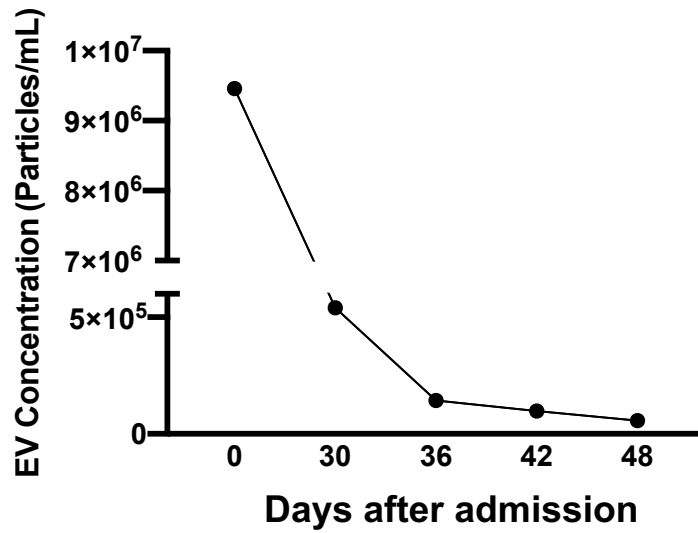

**Supplementary Figure 1. Neutrophil-derived EVs decrease after the acute phase of burn**  
(A) Time-course measurement of neutrophil-derived EVs (CD66b<sup>+</sup>) over duration of hospital stay in a 93%TBSA burn patient.
